# Supplementary material for: SEPT12 phosphorylation results in loss of the septin ring/sperm annulus, defective sperm motility and poor male fertility
Source: PubMed Central journal article supplement (PMC5386304; doi:10.1371/journal.pgen.1006631), 2017-03-27

# Supplementary figure 1

**A**

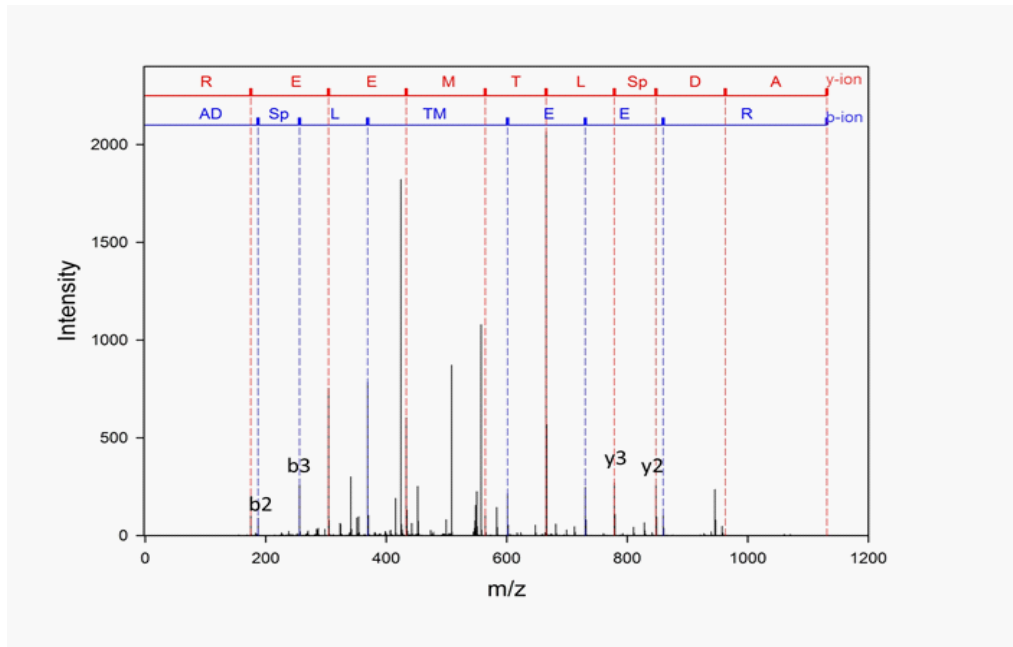

| Protein Name | Accession Number | Sequence    | Mascot Score | MD Score | Theoretical Mass | Mass Error | False Position Rate of Phosphorylation Site Determination Based on MD Score |
|--------------|------------------|-------------|--------------|----------|------------------|------------|-----------------------------------------------------------------------------|
| SEPT12       | IPI00293544      | ADSpLTMEER  | 56.74        | 26.25    | 1130.43          | 0.74       | 0.0021                                                                      |
|              |                  | ADSpLTMoEER | 63.77        | 31.40    | 1146.43          | 0.67       | 0.0008                                                                      |

**B**

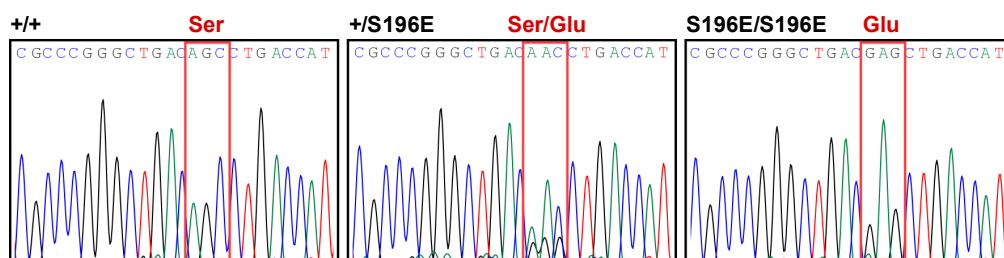

Supplement: pgen.1006631.s001.pdf [file pgen.1006631.s001.pdf]
