# Supplementary material for: SEPT12 phosphorylation results in loss of the septin ring/sperm annulus, defective sperm motility and poor male fertility
Source: PubMed Central journal article supplement (PMC5386304; doi:10.1371/journal.pgen.1006631), 2017-03-27

# Supplementary figure 8

## A

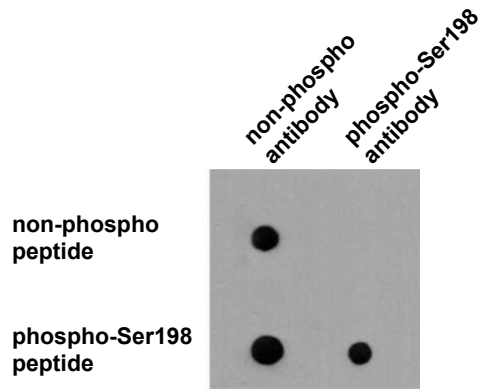

## B

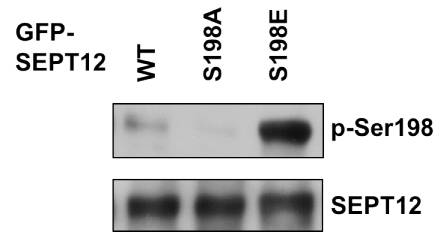

Supplement: pgen.1006631.s008.pdf [file pgen.1006631.s008.pdf]
