# Supplementary material for: SEPT12 phosphorylation results in loss of the septin ring/sperm annulus, defective sperm motility and poor male fertility
Source: PubMed Central journal article supplement (PMC5386304; doi:10.1371/journal.pgen.1006631), 2017-03-27
Supplement: pgen.1006631.s009.pdf [file pgen.1006631.s009.pdf]

Supplementary figure 9

| Subgroup | [R/K]-X-X-[pS/pT]                           |                                                              |     |
|----------|---------------------------------------------|--------------------------------------------------------------|-----|
| SEPT3    | SEPT12_isoform-2                            | VVPVIA <b>R</b> ADSL <b>T</b> MEEREAFRRRIQQ                  | 213 |
|          | SEPT12_isoform-1                            | VVPVIA <b>R</b> ADSL <b>T</b> MEEREAFRRRIQQ                  | 167 |
|          | SEPT9_isoform-A                             | IVPVIA <b>K</b> ADTL <b>T</b> LEERVHFKQRITA                  | 463 |
|          | SEPT9_isoform-B                             | IVPVIA <b>K</b> ADTL <b>T</b> LEERVHFKQRITA                  | 456 |
|          | SEPT9_isoform-C                             | IVPVIA <b>K</b> ADTL <b>T</b> LEERVHFKQRITA                  | 445 |
|          | SEPT9_isoform-D                             | IVPVIA <b>K</b> ADTL <b>T</b> LEERVHFKQRITA                  | 351 |
| SEPT7    | SEPT9_isoform-E                             | IVPVIA <b>K</b> ADTL <b>T</b> LEERVHFKQRITA                  | 299 |
|          | SEPT9_isoform-F                             | IVPVIA <b>K</b> ADTL <b>T</b> LEERVHFKQRITA                  | 212 |
|          | SEPT3_isoform-A                             | IIPVIA <b>K</b> ADTM <b>T</b> LEEKSEFKQRVRK                  | 226 |
|          | SEPT3_isoform-B                             | IIPVIA <b>K</b> ADTM <b>T</b> LEEKSEFKQRVRK                  | 226 |
|          | SEPT7_isoform-1                             | IIPVIA <b>K</b> ADTL <b>T</b> PEECQQFKKQIMK                  | 213 |
|          | SEPT7_isoform-2                             | IIPVIA <b>K</b> ADTL <b>T</b> PEECQQFKKQIMK                  | 212 |
| SEPT2    | SEPT2                                       | IVPVIA <b>K</b> ADTL <b>T</b> LKERERLKKRILD                  | 201 |
|          | SEPT1                                       | IIPVIA <b>G</b> KADALMPQETQALKQKIRD                          | 189 |
|          | SEPT4_isoform-1                             | IVPILAKADTL <b>T</b> PPEVDHKKRKIRE                           | 308 |
|          | SEPT4_isoform-3                             | IVPILAKADTL <b>T</b> PPEVDHKKRKIRE                           | 289 |
|          | SEPT4_isoform-2                             | -LRLLA <b>P</b> PGAV <b>K</b> GTGQ <b>E</b> HQ <b>G</b> ---- | 271 |
|          | SEPT5                                       | IVPLIA <b>K</b> ADCL <b>V</b> PSEIRKLKERIRE                  | 208 |
| SEPT6    | SEPT10_isoform-1                            | IIPVIA <b>K</b> ADTV <b>S</b> KTELQKF <del>K</del> IKLMS     | 227 |
|          | SEPT10_isoform-2                            | IIPVIA <b>K</b> ADTV <b>S</b> KTELQKF <del>K</del> IKLMS     | 204 |
|          | SEPT14                                      | IIPVIA <b>K</b> ADT <b>I</b> SKNDLQTFKNKIMS                  | 213 |
|          | SEPT6_isoform-A                             | IIPVIA <b>K</b> ADAI <b>S</b> KSELTKFKIKITS                  | 203 |
|          | SEPT6_isoform-B                             | IIPVIA <b>K</b> ADAI <b>S</b> KSELTKFKIKITS                  | 203 |
|          | SEPT6_isoform-D                             | IIPVIA <b>K</b> ADAI <b>S</b> KSELTKFKIKITS                  | 203 |
|          | SEPT8_isoform-A                             | IIPVIA <b>K</b> ADT <b>I</b> SKSELHKFKIKIMG                  | 205 |
|          | SEPT8_isoform-B                             | IIPVIA <b>K</b> ADT <b>I</b> SKSELHKFKIKIMG                  | 205 |
|          | SEPT8_isoform-C                             | IIPVIA <b>K</b> ADT <b>I</b> SKSELHKFKIKIMG                  | 205 |
|          | SEPT8_isoform-D                             | IIPVIA <b>K</b> ADT <b>I</b> SKSELHKFKIKIMG                  | 145 |
| SEPT11   | IIPVIA <b>K</b> ADT <b>I</b> AKNELHKFKSKIMS | 202                                                          |     |
